# Supplementary material for: Anti-Metastatic Effects of Plant Sap-Derived Extracellular Vesicles in a 3D Microfluidic Cancer Metastasis Model
Source: J Funct Biomater. 2020 Jul 8;11(3):49. doi: 10.3390/jfb11030049 (PMC7563847; doi:10.3390/jfb11030049)
Supplement: Supplementary file 1 [file jfb-11-00049-s001.pdf]

Supplementary

# Anti-Metastatic Effects of Plant Sap-Derived Extracellular Vesicles in a 3D Microfluidic Cancer Metastasis Model

Kimin Kim <sup>1</sup>, Jik-Han Jung <sup>2</sup>, Hye Ju Yoo <sup>1</sup>, Jae-Kyung Hyun <sup>3</sup>, Ji-Ho Park <sup>2</sup>, Dokyun Na <sup>4</sup> and Ju Hun Yeon <sup>1,\*</sup>

<sup>1</sup> Department of Integrative Biosciences, University of Brain Education, Cheonan 31228, Korea; abc-632@hanmail.net (K.K.); hyeju\_yoo@naver.com (H.J.Y.)

<sup>2</sup> Department of Bio and Brain engineering, Korea Advanced Institute of Science and Technology, Daejeon 34141, Korea; jjhan@kaist.ac.kr (J.-H.J.); jihopark@kaist.ac.kr (J.-H.P.)

<sup>3</sup> Electron Microscopy Research Center, Korea Basic Science Institute, Cheongju 28119, Korea; jaekyung.hyun@oist.jp

<sup>4</sup> School of Integrative Engineering, Chung-Ang University, Seoul 06911, Korea; blisszen@lile.cau.ac.kr

\* Correspondence: jhyeon@ube.ac.kr; Tel.: +82-41-529-2621; Fax: +82-41-529-2674

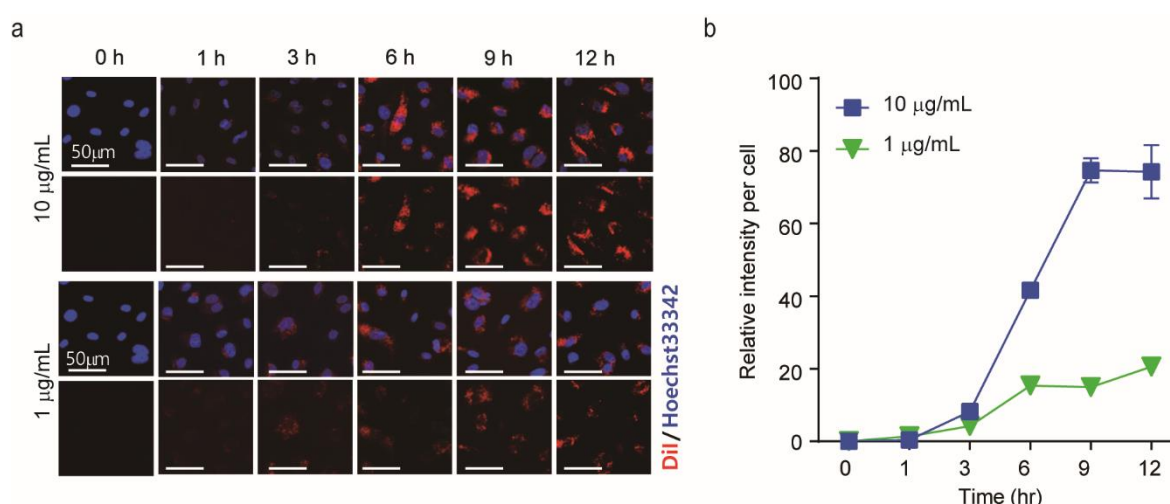

**Figure S1.** Uptake of DM-EVs into HUVECs. (a) Representative fluorescence microscopic images of cellular uptake of fluorescently labeled DM-EVs. (b) A comparison of fluorescence intensity with different time of 0, 1, 3, 6, 9, 12 h, respectively. Scale bar: 50 μm.

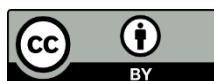

© 2020 by the authors. Submitted for possible open access publication under the terms and conditions of the Creative Commons Attribution (CC BY) license (<http://creativecommons.org/licenses/by/4.0/>).
